# Supplementary material
Source: PubMed Central journal article supplement (PMC3602314)

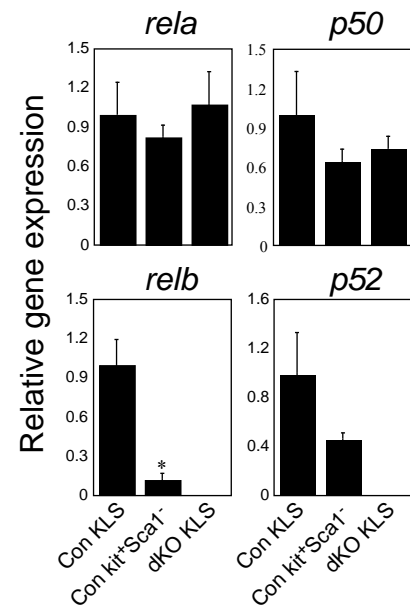

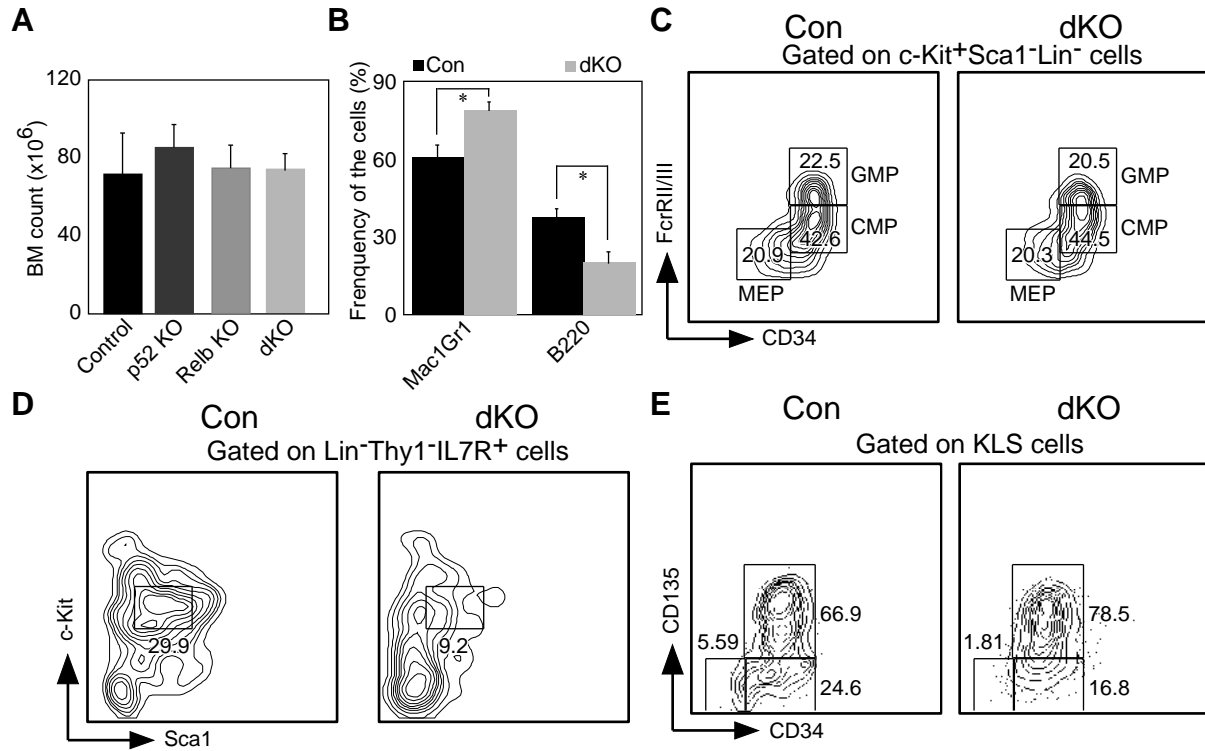

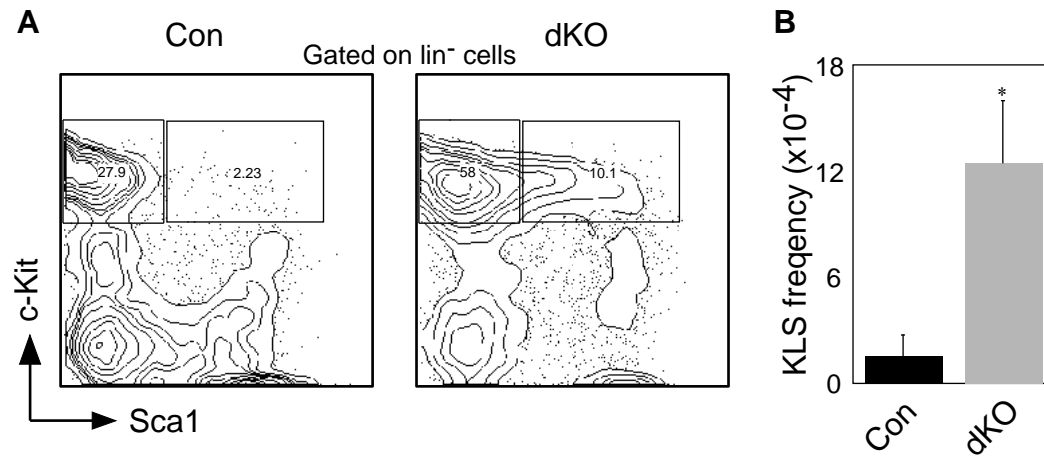

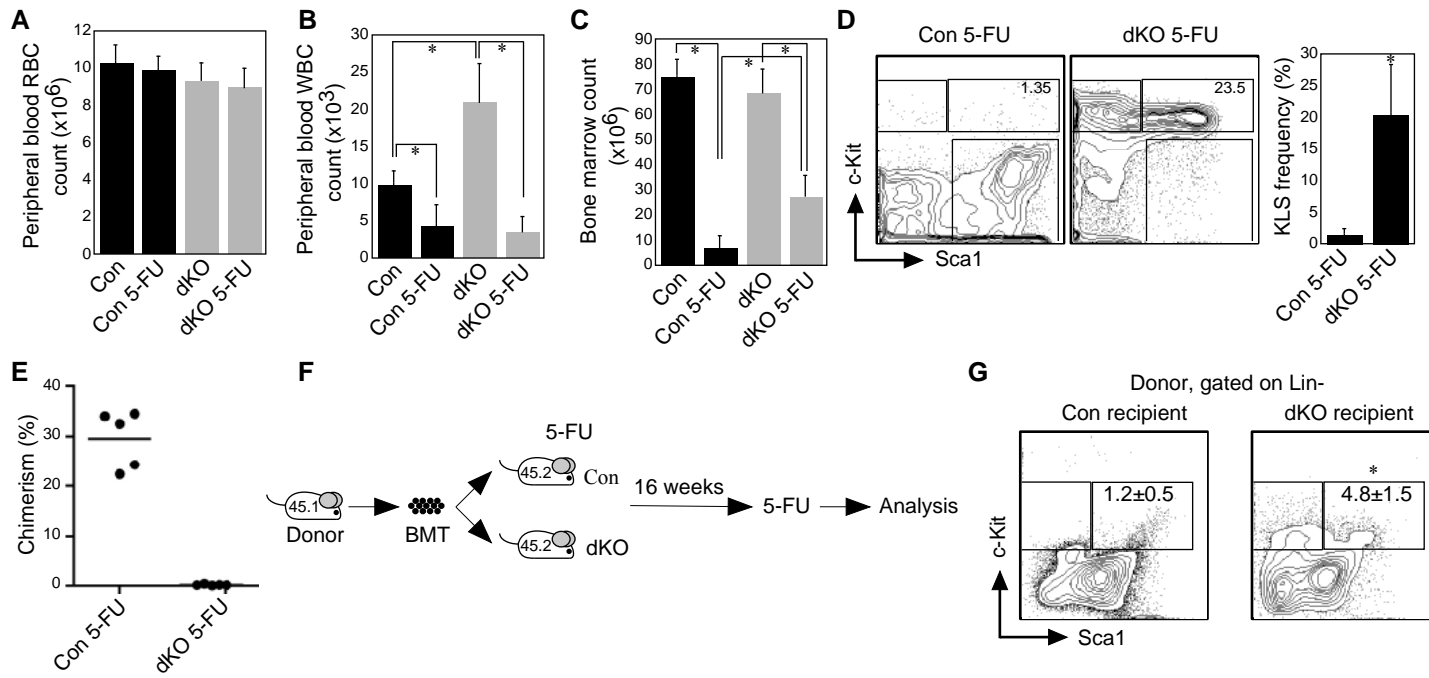

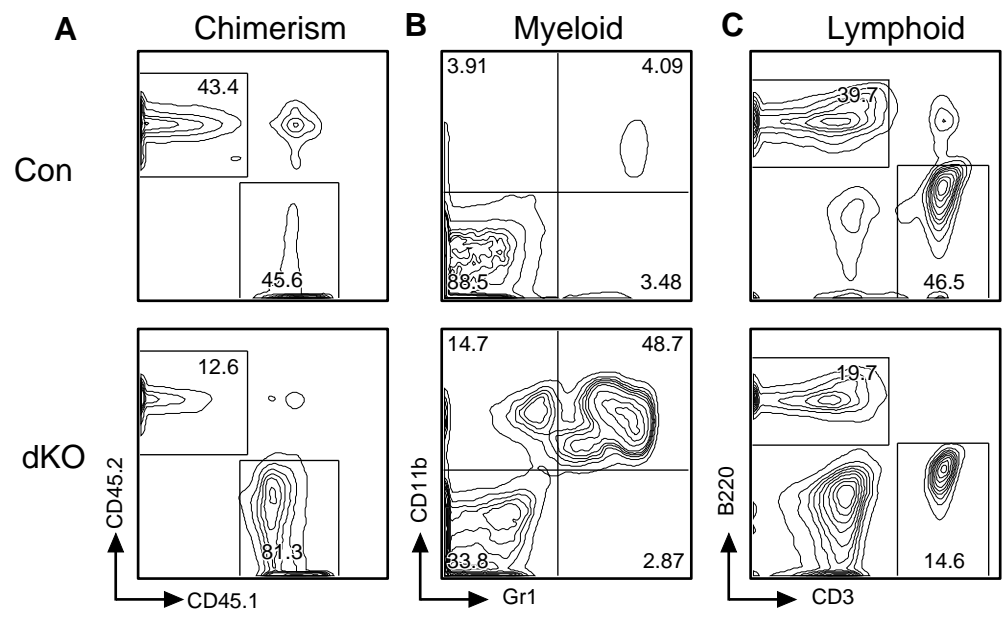

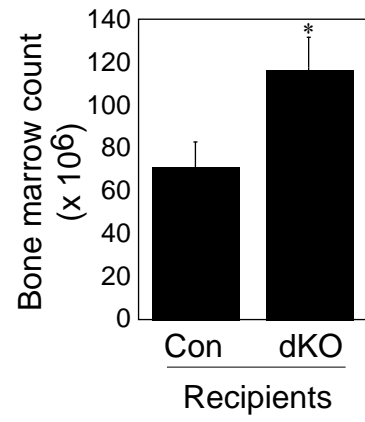

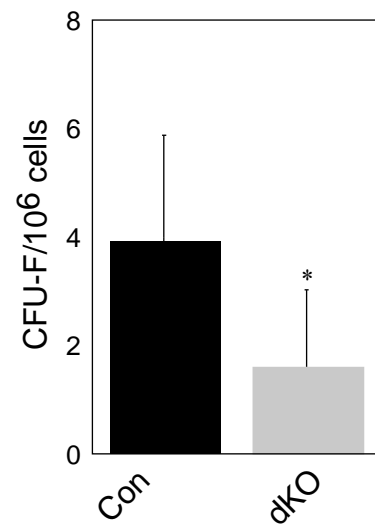

Con

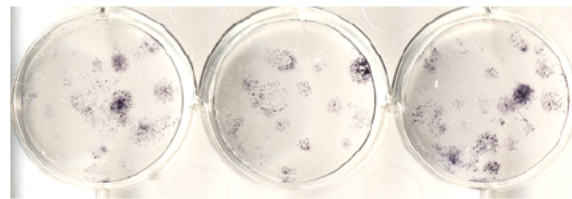

dKO

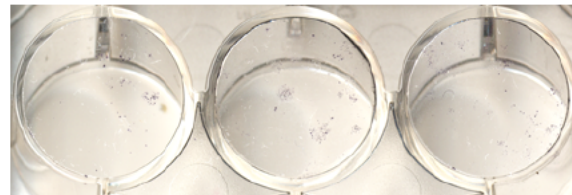



**A** Gated on CD45<sup>+</sup>Ter119<sup>-</sup>CD31<sup>-</sup> cells

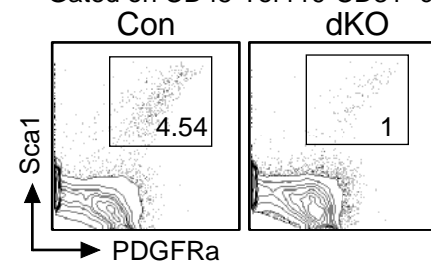

**B**

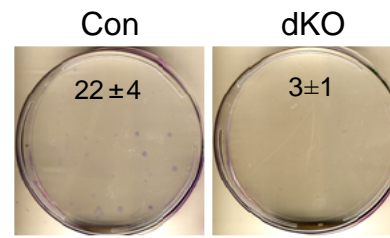

**A**

Liver

Con

dKO

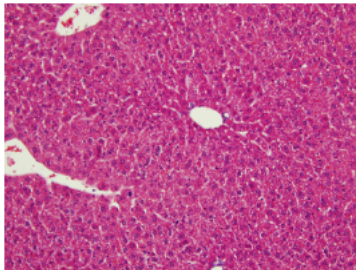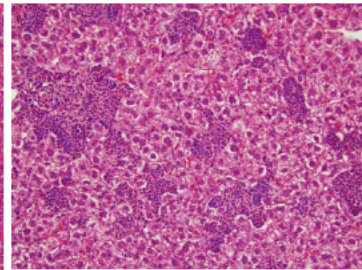

Con recipient

dKO recipient

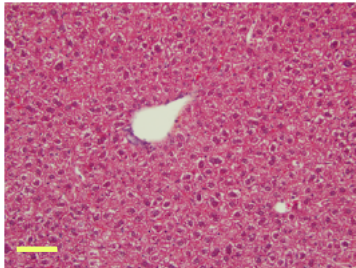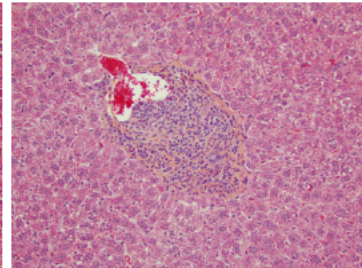

**B**

Lung

Con

dKO

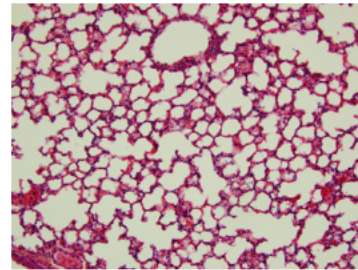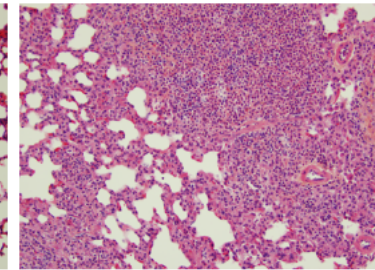

Con recipient

dKO recipient

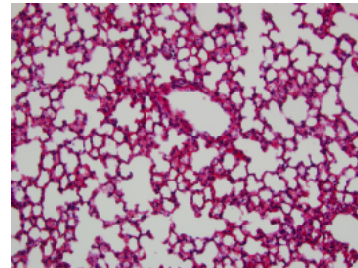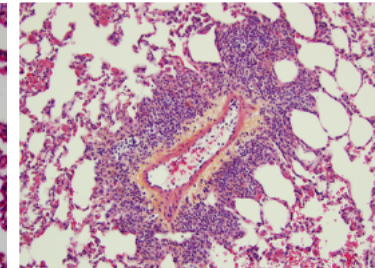

**A.** Hematopoiesis with normal NF- $\kappa$ B non-canonical signaling

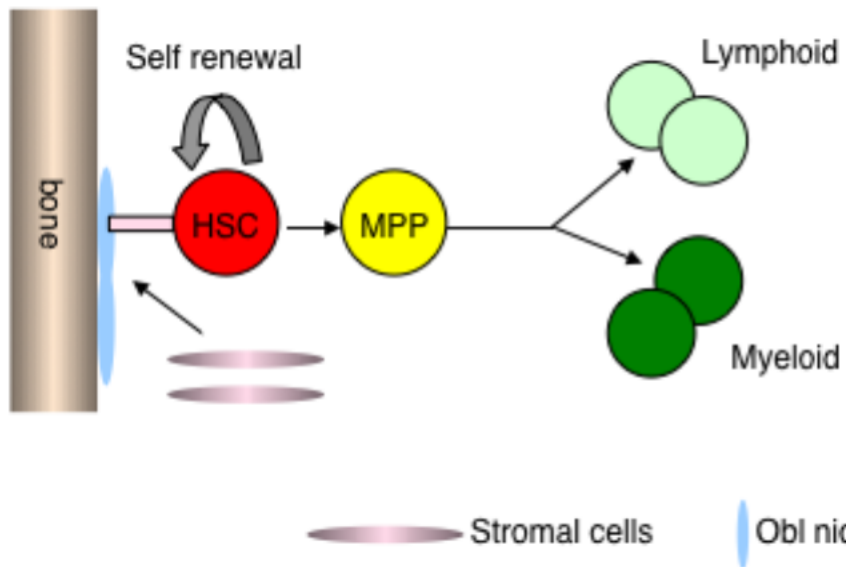

**B.** Hematopoiesis with NF- $\kappa$ B non-canonical signaling depleted

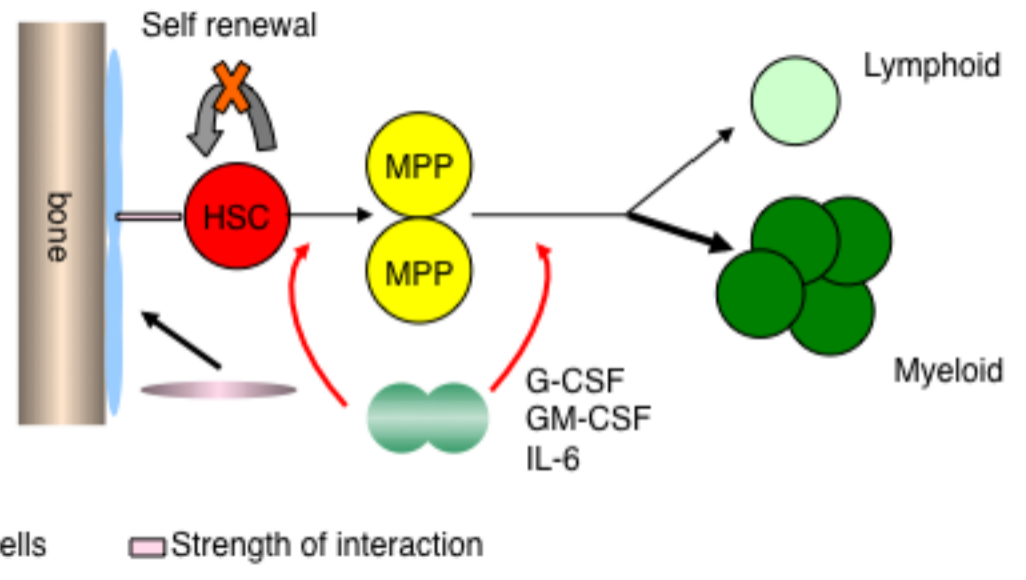

Supplement: NIHMS371848-supplement-SupplFigures.pdf [file NIHMS371848-supplement-SupplFigures.pdf]
